# Supplementary material for: Two-dimensional square and hexagonal oxide quasicrystal approximants in SrTiO3 films grown on Pt(111)/Al2O3(0001)
Source: Royal Society of Chemistry journal article supplement (doi:10.1039/d1cp05296a), 2022-01-01
Supplement: d1cp05296a4.pdf [file d1cp05296a4.pdf]

# Two-dimensional square and hexagonal oxide quasicrystal approximants in SrTiO<sub>3</sub> films grown on Pt(111)/Al<sub>2</sub>O<sub>3</sub>(0001)

C. Ruano M.,<sup>\*,†,§</sup> T. T. Dorini,<sup>\*,†,§</sup> F. Brix,<sup>†,¶</sup> L. Pasquier,<sup>†</sup> M. Jullien,<sup>†</sup> D.  
Pierre,<sup>†</sup> S. Andrieu,<sup>†</sup> K. Dumesnil,<sup>†</sup> S. S. Parapari,<sup>‡,¶</sup> S. Šturm,<sup>‡,¶</sup> J. Ledieu,<sup>†,¶</sup>  
M. Sicot,<sup>†,¶</sup> O. Copie,<sup>†</sup> E. Gaudry,<sup>\*,†,¶</sup> and V. Fournée<sup>\*,†,¶</sup>

<sup>†</sup>*Institut Jean Lamour UMR 7198, Université de Lorraine – CNRS, Nancy, France.*

<sup>‡</sup>*Jožef Stefan Institute, Jamova Cesta 39, Ljubljana 1000, Slovenia.*

<sup>¶</sup>*International Associated Laboratory PACS2, CNRS Université de Lorraine, Nancy, France and  
Jožef Stefan Institute, Ljubljana, Slovenia.*

<sup>§</sup>*Contributed equally to this work.*

E-mail: catalina.ruano-merchan@univ-lorraine.fr; thiago.trevizam-dorini@univ-lorraine.fr;  
emilie.gaudry@univ-lorraine.fr; vincent.fournee@univ-lorraine.fr

**Supporting Information Available**

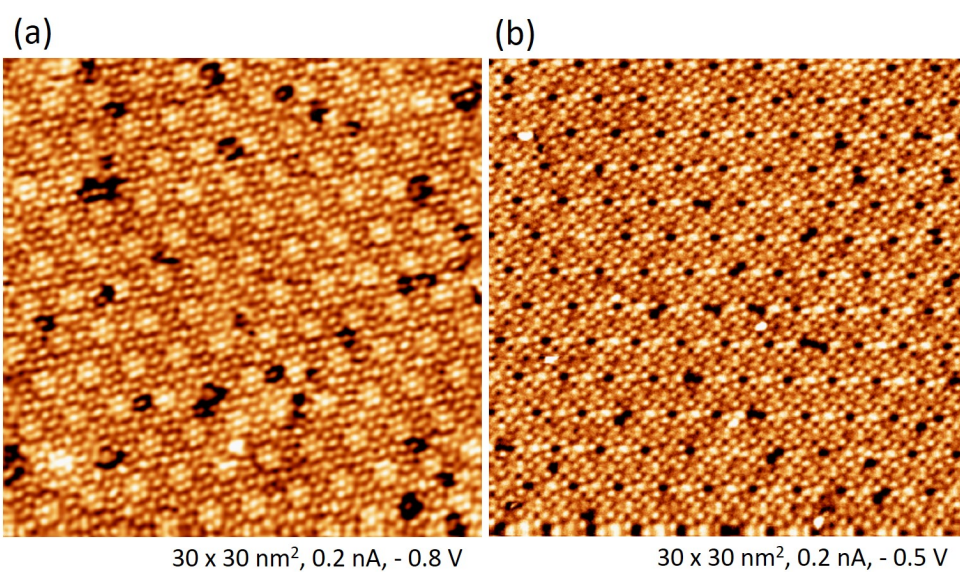

Figure 1: STM images of the two variants of the hexagonal approximant. The variant shown in (a) has a central protrusion at the center of the dodecagonal motifs while the one shown in (b) has a vacancy instead.

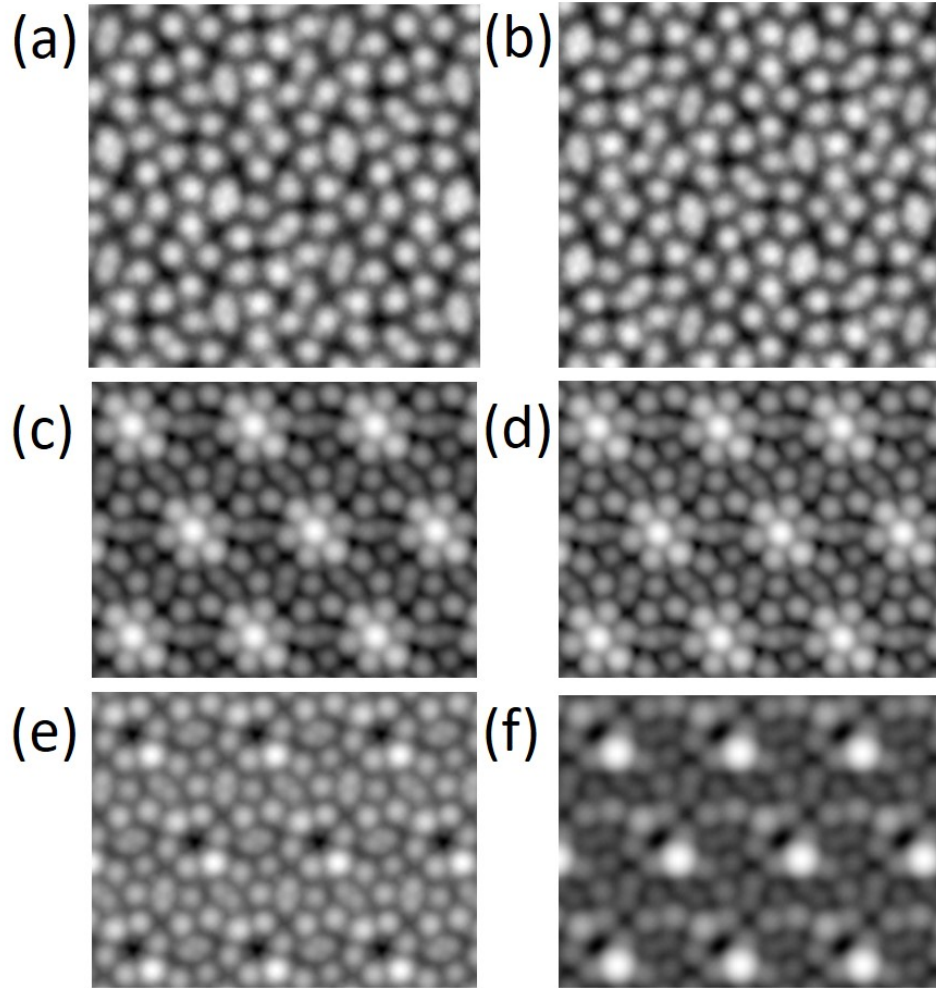

Figure 2: (a,b) Simulated STM images of the square approximant ( $V_{bias} = -1$  V (a) or  $+1$  V (b), isosurface with charge density equal to  $0.1 e nm^{-3}$ ). (c,d) Simulated STM images of the hexagonal approximant with the occupied central protrusion ( $V_{bias} = -1$  V (c) or  $+1$  V (d), isosurface with charge density equal to  $0.2 e nm^{-3}$ ). (e,f) Simulated STM images of the hexagonal approximant with the unoccupied central protrusion ( $V_{bias} = -1.5$  V (e) or  $+1.5$  V (f), isosurface with charge density equal to  $0.1 e nm^{-3}$ ).
