# Supplementary figures and images for: Two-dimensional square and hexagonal oxide quasicrystal approximants in SrTiO3 films grown on Pt(111)/Al2O3(0001)
Source: Royal Society of Chemistry journal article supplement (doi:10.1039/d1cp05296a), 2022-01-01

(a)

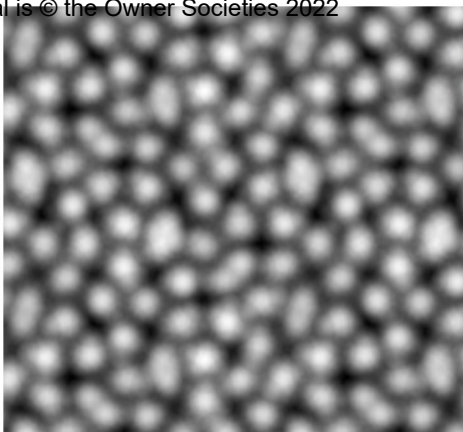

(b)

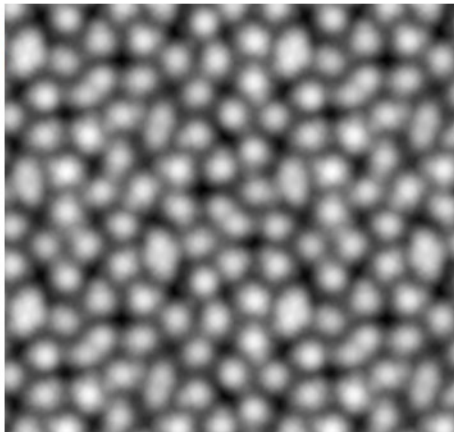

(c)

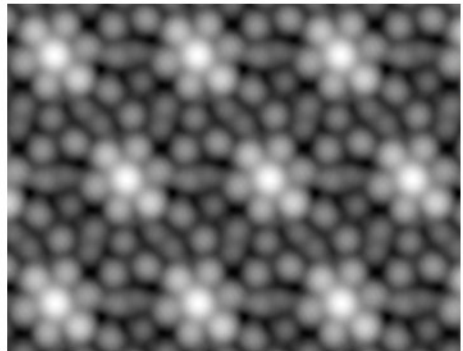

(d)

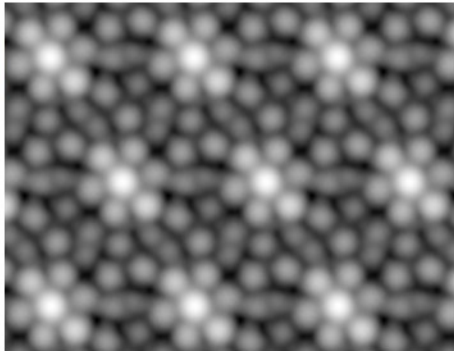

(e)

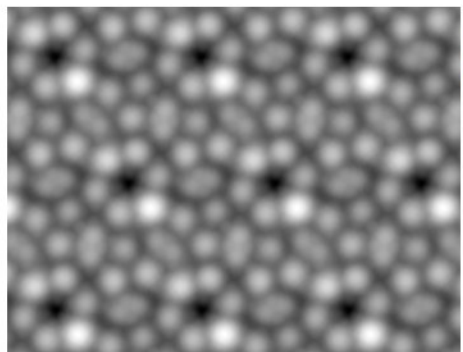

(f)

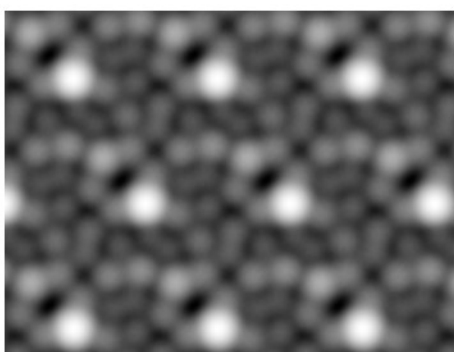

Supplement: d1cp05296a3.pdf [file d1cp05296a3.pdf]
